# Supplementary material for: Activity Profiles among Older Adults: Latent Class Analysis Using the Korean Time Use Survey
Source: MDPI journal article supplement (doi:10.3390/ijerph18168786), 2021-08-20
Supplement: s1 [file s1]

Supplementary Material

**Table S1.** Pearson correlation matrix among activity domains (continuous activity indicators): KTUS 2014

|    | F1       | F2       | F3       | F4       | F5      | F6       | F7     | F8   |
|----|----------|----------|----------|----------|---------|----------|--------|------|
| F1 | 1.00     |          |          |          |         |          |        |      |
| F2 | -0.19*** | 1.00     |          |          |         |          |        |      |
| F3 | 0.06**   | -0.06**  | 1.00     |          |         |          |        |      |
| F4 | -0.25*** | 0.03     | -0.15*** | 1.00     |         |          |        |      |
| F5 | -0.01    | -0.04*   | 0.003    | 0.02     | 1.00    |          |        |      |
| F6 | -0.42*** | -0.10*** | -0.18*** | -0.26*** | -0.06** | 1.00     |        |      |
| F7 | -0.12*** | -0.01    | -0.09*** | -0.02    | -0.04*  | -0.14*** | 1.00   |      |
| F8 | -0.09*** | -0.01    | -0.02    | 0.04*    | -0.01   | -0.07*** | -0.04* | 1.00 |

F1: personal leisure, F2: civic/religious/educational activity, F3: physical exercise, F4: interior household chores, F5: exterior household chores, F6: paid work, F7: interpersonal exchange, F8: caregiving; \* p<.05 \*\* p<.01 \*\*\* p<.001

**Table S2.** Pearson correlation matrix among activity domains (continuous activity indicators): KTUS 2019

|    | F1       | F2       | F3       | F4       | F5       | F6       | F7    | F8   |
|----|----------|----------|----------|----------|----------|----------|-------|------|
| F1 | 1.00     |          |          |          |          |          |       |      |
| F2 | -0.19*** | 1.00     |          |          |          |          |       |      |
| F3 | 0.05***  | -0.06*** | 1.00     |          |          |          |       |      |
| F4 | -0.21*** | 0.04*    | -0.14*** | 1.00     |          |          |       |      |
| F5 | -0.003   | 0.01*    | -0.003   | 0.03     | 1.00     |          |       |      |
| F6 | -0.41*** | -0.10*** | -0.19*** | -0.28*** | -0.08*** | 1.00     |       |      |
| F7 | -0.10*** | -0.01    | -0.08*** | 0.01     | -0.02    | -0.17*** | 1.00  |      |
| F8 | -0.10*** | -0.02    | -0.06*** | 0.10***  | -0.02    | -0.07*** | -0.02 | 1.00 |

F1: personal leisure, F2: civic/religious/educational activity, F3: physical exercise, F4: interior household chores, F5: exterior household chores, F6: paid work, F7: interpersonal exchange, F8: caregiving; \* p<.05 \*\* p<.01 \*\*\* p<.001

**Table S3.** Polychoric correlation matrix among activity domains (ordinal activity indicators): KTUS 2014

|    | F1       | F2       | F3       | F4       | F5     | F6       | F7   | F8   |
|----|----------|----------|----------|----------|--------|----------|------|------|
| F1 | 1.00     |          |          |          |        |          |      |      |
| F2 | -0.27*** | 1.00     |          |          |        |          |      |      |
| F3 | 0.12***  | -0.04    | 1.00     |          |        |          |      |      |
| F4 | -0.21*** | 0.15***  | -0.13*** | 1.00     |        |          |      |      |
| F5 | 0.004    | -0.05    | 0.10**   | 0.04     | 1.00   |          |      |      |
| F6 | -0.52*** | -0.20*** | -0.24*** | -0.30*** | -0.08* | 1.00     |      |      |
| F7 | -0.13*** | 0.08**   | -0.05*   | 0.04     | -0.04  | -0.12*** | 1.00 |      |
| F8 | -0.16*** | 0.03     | 0.02     | 0.19***  | -0.04  | -0.18*** | 0.02 | 1.00 |

F1: personal leisure, F2: civic/religious/educational activity, F3: physical exercise, F4: interior household chores, F5: exterior household chores, F6: paid work, F7: interpersonal exchange, F8: caregiving; \* p<.05 \*\* p<.01 \*\*\* p<.001

**Table S4.** Polychoric correlation matrix among activity domains (ordinal activity indicators): KTUS 2019

|    | F1       | F2       | F3       | F4       | F5       | F6       | F7   | F8   |
|----|----------|----------|----------|----------|----------|----------|------|------|
| F1 | 1.00     |          |          |          |          |          |      |      |
| F2 | -0.17*** | 1.00     |          |          |          |          |      |      |
| F3 | 0.12***  | -0.04*   | 1.00     |          |          |          |      |      |
| F4 | -0.17*** | 0.12***  | -0.10*** | 1.00     |          |          |      |      |
| F5 | 0.01     | 0.07**   | 0.02     | 0.16***  | 1.00     |          |      |      |
| F6 | -0.59*** | -0.10*** | -0.26*** | -0.38*** | -0.21*** | 1.00     |      |      |
| F7 | -0.08*** | 0.05*    | -0.08*** | 0.09***  | 0.01     | -0.23*** | 1.00 |      |
| F8 | -0.16*** | -0.01    | -0.08*** | 0.23***  | -0.03    | -0.21*** | 0.02 | 1.00 |

F1: personal leisure, F2: civic/religious/educational activity, F3: physical exercise, F4: interior household chores, F5: exterior household chores, F6: paid work, F7: interpersonal exchange, F8: caregiving; \* p<.05 \*\* p<.01 \*\*\* p<.001
